# Supplementary material for: A facile and new type of route to the redox-active rigid-rod complex [{Mn(dmpe)2(CCH)}2(μ-C4)][PF6] via Mn–C2˙ radical coupling
Source: Royal Society of Chemistry journal article supplement (doi:10.1039/b102396a), 2001-01-01
Supplement: b102396a.pdf [file b102396a.pdf]

## **A Facile and New Type of Route to the Redox-active Rigid-rod Complex**

### **$[\{\text{Mn}(\text{dmpe})_2(\text{C}\equiv\text{CH})\}_2(\mu\text{-C}_4)][\text{PF}_6]$ via Mn-C<sub>2</sub>· Radical Coupling**

**Francisco J. Fernández, Olivier Blacque, Montserrat Alfonso and Heinz Berke\***

*Anorganisch-Chemisches Institut der Universität Zürich, Winterthurerstrasse 190, CH-8057*

*Zürich, Switzerland;*

*E-mail: hberke@aci.unizh.ch*

## Computational details

All calculations reported in the paper were performed using the Amsterdam Density Functional program package ADF, release 2000.01.<sup>1</sup> The Vosko-Wilk-Nusair parametrization<sup>2a</sup> was used for the local-density approximation (LDA) with the addition of gradient corrections due to Becke<sup>2b</sup> and Perdew<sup>2c</sup> (GGA). The hydrogen atom was represented by a double- $\xi$  STO basis function for the 1s orbital and a single- $\xi$  2p polarization function (ADF database III). The frozen-core approximation was applied for the 1s electrons of the carbon atom, and for the 1s, 2s and 2p electrons of phosphorus and manganese elements. The valence shells of these non-hydrogen elements were described with a triple- $\xi$  STO basis set plus one polarization function (ADF database IV). Optimized geometries and bonding energies of the singlet and triplet states of the model complex  $\text{Mn}(\text{dHpe})_2(\text{C}\equiv\text{CH})(\text{C}\equiv\text{C})$  are given below.

## References

- 1 (a) E. J. Baerends, D. E. Ellis, and P. Ros *Chem. Phys.* 1973, **2**, 41; (b) L. Versluis and T. Ziegler *J. Chem. Phys.* 1988, **322**, 88; (c) G. te Velde and E. J. Baerends *J. Comput. Phys.* 1992, **99**, 84; (d) C. Fonseca Guerra, J. G. Snijders, G. te Velde and E. J. Baerends *Theor. Chem. Acc.* 1988, **99**, 391.
- 2 (a) S.H. Vosko, L. Wilk and M. Nusair *Can. J. Phys.* 1980, **58**, 1200; (b) A.D. Becke *Phys. Rev. A* 1988, **38**, 3098; (c) J.P. Perdew *Phys. Rev. B* 1986, **33**, 8822.

## Optimized geometries and bonding energies

**(dHpe)<sub>2</sub>Mn(C≡C)(C≡CH) spin 0**

ADF 2000.01 RunTime: Dec12-2000 09:26:33

## GEOMETRY OPTIMIZATION

```
Final Geometry      (x,y,z in Angstrom)
Mn      0.000000      0.000000      0.082648
P       2.253147      0.022778     -0.000721
P      -0.166086      2.247627      0.091929
C       0.000000      0.000000     -1.773127
C       0.000000      0.000000      2.042846
P       0.166086     -2.247627      0.091929
P      -2.253147     -0.022778     -0.000721
C       0.000000      0.000000      3.282060
H       0.000000      0.000000      4.355714
C       0.000000      0.000000     -3.078194
C       2.847108     -1.679833     -0.560787
H       2.991706      0.870171     -0.888507
H       3.038908      0.223449      1.184376
C      -1.992764      2.758332      0.117593
H       0.332433      3.003219     -1.018994
H       0.341359      3.069364      1.151973
C       1.992764     -2.758332      0.117593
H      -0.332433     -3.003219     -1.018994
H      -0.341359     -3.069364      1.151973
C      -2.847108     -1.679833     -0.560787
H      -2.991706     -0.870171     -0.888507
H      -3.038908     -0.223449      1.184376
H       2.705691     -1.693511     -1.651980
H       3.917156     -1.811314     -0.346359
H       2.262330     -2.853935      1.180418
H       2.123153     -3.741389     -0.355827
H      -2.262330      2.853935      1.180418
H      -2.123153      3.741389     -0.355827
H      -2.705691      1.693511     -1.651980
H      -3.917156      1.811314     -0.346359
```

Total Bonding Energy:  
-5.637425841973375 hartree  
-3537.54 kcal/mol  
-14801.06 kJ/mol

Total Charge: 0.00  
Spin Polarization: 0.00

```
Summary Geometry Optimization
Item      Value      Criterion
-----
change in energy -0.00001868  0.00300000
gradient max    0.00262557  0.00300000
gradient rms    0.00056906  0.00333333
=====
```

**(dHpe)<sub>2</sub>Mn(C≡C)(C≡CH) spin 2**

ADF 2000.01 RunTime: Jan09-2001 14:58:33

## GEOMETRY OPTIMIZATION

```
Final Geometry      (x,y,z in Angstrom)
Mn      0.000000      0.000000      0.086868
P       2.261707     -0.007789      0.012469
P      -0.195360      2.256896      0.076283
C       0.000000      0.000000     -1.771384
C       0.000000      0.000000      2.074268
P       0.195360     -2.256896      0.076283
P      -2.261707      0.007789      0.012469
C       0.000000      0.000000      3.308526
H       0.000000      0.000000      4.382106
C       0.000000      0.000000     -3.069486
C       2.874458     -1.694785     -0.565399
H       3.006235      0.859772     -0.849505
H       3.027708      0.182483      1.211725
C      -2.015569      2.784463      0.088084
H       0.320094      2.994357     -1.036285
H       0.314308      3.083476      1.131514
C      -2.015569     -2.784463      0.088084
H      -0.320094     -2.994357     -1.036285
H      -0.314308     -3.083476     -1.131514
C      -2.874458     -1.694785     -0.565399
H      -3.006235     -0.859772     -0.849505
H      -3.027708     -0.182483      1.211725
H       2.746136     -1.693981     -1.658009
H       3.941800     -1.820680     -0.335131
H       2.284715     -2.908550      1.147952
H       2.134491     -3.756200     -0.410477
H      -2.284715      2.908550      1.147952
H      -2.134491      3.756200     -0.410477
H      -2.746136      1.693981     -1.658009
H      -3.941800      1.820680     -0.335131
```

Total Bonding Energy:  
-5.671409668487392 hartree  
-3558.86 kcal/mol  
-14890.29 kJ/mol

Total Charge: 0.00  
Spin Polarization: 2.00  
Spin Density:

```
# Atom Spin
-----
1 Mn      1.4533
10 C      0.6098
```

```
Summary Geometry Optimization
Item      Value      Criterion
-----
change in energy -0.00003351  0.00300000
gradient max    0.00118426  0.00300000
gradient rms    0.00039765  0.00333333
=====
```
